# Supplementary material
Source: PubMed Central journal article supplement (PMC2018664)
Supplement: blood_blood-2007-02-072843_1.pdf [file blood_blood-2007-02-072843_1.pdf]

| V $\beta$      | CTLs #1        |                             |                              | CTLs #2        |                             |                              | CTLs #3        |                             |                              |
|----------------|----------------|-----------------------------|------------------------------|----------------|-----------------------------|------------------------------|----------------|-----------------------------|------------------------------|
|                | $\Delta$ CD34v | iC. $\Delta$ CD34/<br>IL-2v | iC. $\Delta$ CD34/<br>IL-15v | $\Delta$ CD34v | iC. $\Delta$ CD34/<br>IL-2v | iC. $\Delta$ CD34/<br>IL-15v | $\Delta$ CD34v | iC. $\Delta$ CD34/<br>IL-2v | iC. $\Delta$ CD34/<br>IL-15v |
|                | V $\beta$ 1    | 2.9                         | 3.1                          | 3.1            | 12.8                        | 11.2                         | 9.6            | 0.2                         | 0.6                          |
| V $\beta$ 2    | 1.5            | 1.1                         | 0.9                          | 1.93           | 1.05                        | 2.9                          | 3.68           | 4.1                         | 4                            |
| V $\beta$ 3    | 2.83           | 2.3                         | 2.8                          | 1.34           | 1.24                        | 1.34                         | 29             | 26                          | 28                           |
| V $\beta$ 4    | 0              | 0                           | 0                            | 0.29           | 0.38                        | 0.35                         | 0.1            | 0.2                         | 0.04                         |
| V $\beta$ 5.1  | 2.4            | 2.3                         | 2.4                          | 5.35           | 7.6                         | 5.8                          | 3.4            | 3.2                         | 0.1                          |
| V $\beta$ 5.2  | 0.6            | 0.3                         | 0.6                          | 5.1            | 7.5                         | 5.7                          | 0.4            | 0.4                         | 0.4                          |
| V $\beta$ 5.3  | 1.62           | 1.7                         | 2.4                          | 0.31           | 0.72                        | 1.5                          | 1.6            | 1.3                         | 1.3                          |
| V $\beta$ 7.1  | 5.6            | 4                           | 4.4                          | 0.44           | 0.78                        | 1.8                          | 3.97           | 3.8                         | 3.8                          |
| V $\beta$ 7.2  | 0              | 0                           | 0                            | 0.05           | 0.1                         | 0.1                          | 0.02           | 0.09                        | 0                            |
| V $\beta$ 8    | 1.4            | 1.1                         | 1.6                          | 0.42           | 1.7                         | 4.3                          | 0.4            | 0.8                         | 0.5                          |
| V $\beta$ 9    | 2.7            | 2.3                         | 1.3                          | 2.53           | 3                           | 3                            | 2.5            | 2.8                         | 2.3                          |
| V $\beta$ 11   | 0.3            | 0.3                         | 0.2                          | 1.19           | 1.4                         | 1.6                          | 1.7            | 1.8                         | 2.1                          |
| V $\beta$ 12   | 0.5            | 0.4                         | 0.4                          | 0.12           | 0.1                         | 0.1                          | 1.9            | 2.1                         | 2.1                          |
| V $\beta$ 13.1 | 1.3            | 1.5                         | 1.2                          | 1.22           | 0.38                        | 1.12                         | 0.44           | 0.8                         | 0.5                          |
| V $\beta$ 13.2 | 4.1            | 3.3                         | 4                            | 3.55           | 1.8                         | 1.4                          | 0.5            | 0.4                         | 0.2                          |
| V $\beta$ 13.6 | 1.4            | 1.1                         | 1.5                          | 0.22           | 0.32                        | 0.34                         | 0.4            | 0.4                         | 0.3                          |
| V $\beta$ 14   | 15.5           | 19.7                        | 21.3                         | 4.59           | 1.1                         | 2.99                         | 2.2            | 4.2                         | 2.9                          |
| V $\beta$ 16   | 1.5            | 1.2                         | 0.6                          | 0.1            | 0.1                         | 0.48                         | 0.05           | 0.2                         | 0.03                         |
| V $\beta$ 17   | 1.78           | 2.1                         | 1.1                          | 4.22           | 2.64                        | 2.1                          | 0.2            | 0.3                         | 0.2                          |
| V $\beta$ 18   | 0.53           | 0.5                         | 0.4                          | 0.08           | 0.22                        | 1.6                          | 0.1            | 0.2                         | 3.1                          |
| V $\beta$ 20   | 0.5            | 0.7                         | 0.7                          | 23.7           | 14                          | 5.78                         | 0.4            | 0.5                         | 0.3                          |
| V $\beta$ 21.3 | 0.5            | 0.6                         | 0.6                          | 0.46           | 0.2                         | 0.2                          | 0.8            | 0.8                         | 0.8                          |
| V $\beta$ 22   | 3.1            | 4.1                         | 2.6                          | 0.81           | 0.5                         | 0.78                         | 6.6            | 2.9                         | 5.1                          |
| V $\beta$ 23   | 1.4            | 2.2                         | 2.3                          | 37.4           | 42                          | 46                           | 0.1            | 0.3                         | 0.6                          |

$\Delta$ CD34v = CTLs transduced with the  $\Delta$ CD34v control vector; iC. $\Delta$ CD34/IL-2v = CTLs transduced with the iC. $\Delta$ CD34/IL-2v; iC. $\Delta$ CD34/IL-15v CTLs transduced with the iC. $\Delta$ CD34/IL-15v.
