# Supplementary material
Source: PubMed Central journal article supplement (PMC2018664)

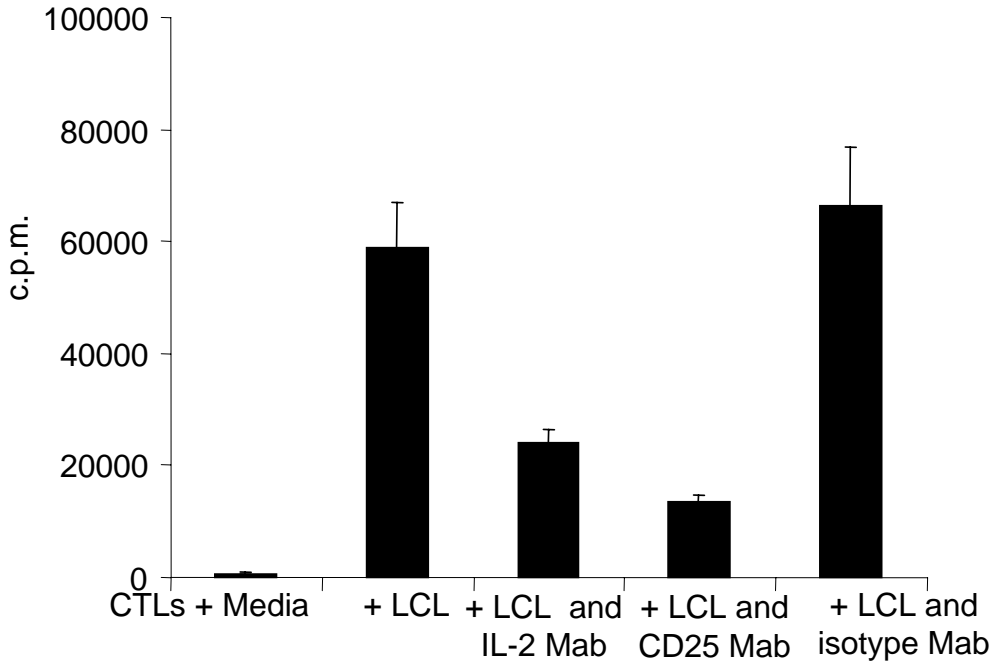

Supplement: blood_blood-2007-02-072843_2.pdf [file blood_blood-2007-02-072843_2.pdf]

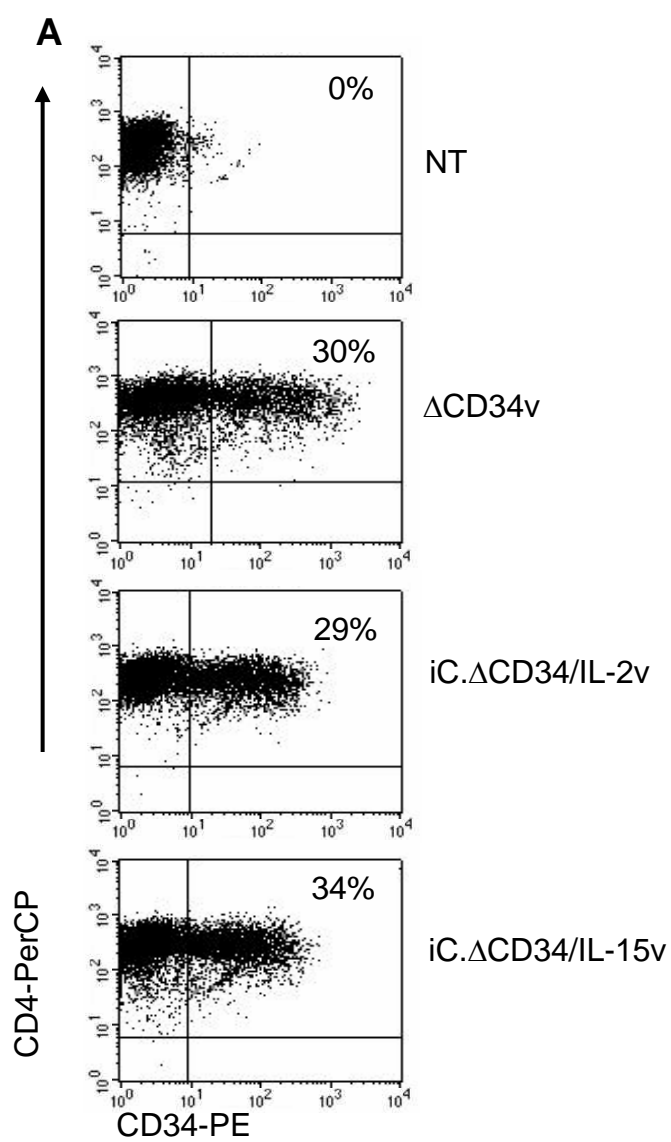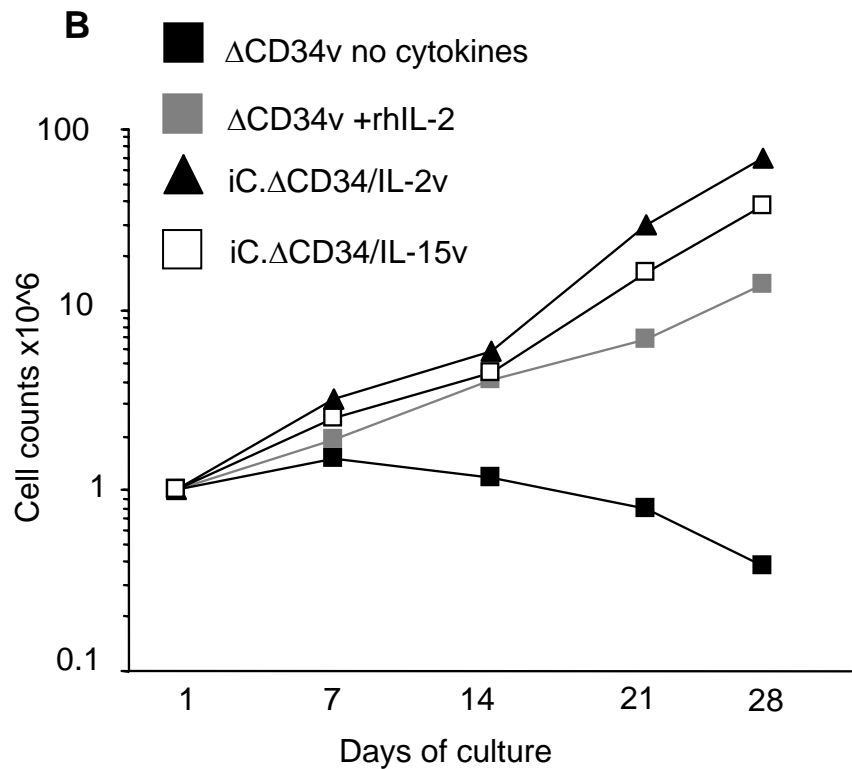

Supplement: blood_blood-2007-02-072843_3.pdf [file blood_blood-2007-02-072843_3.pdf]

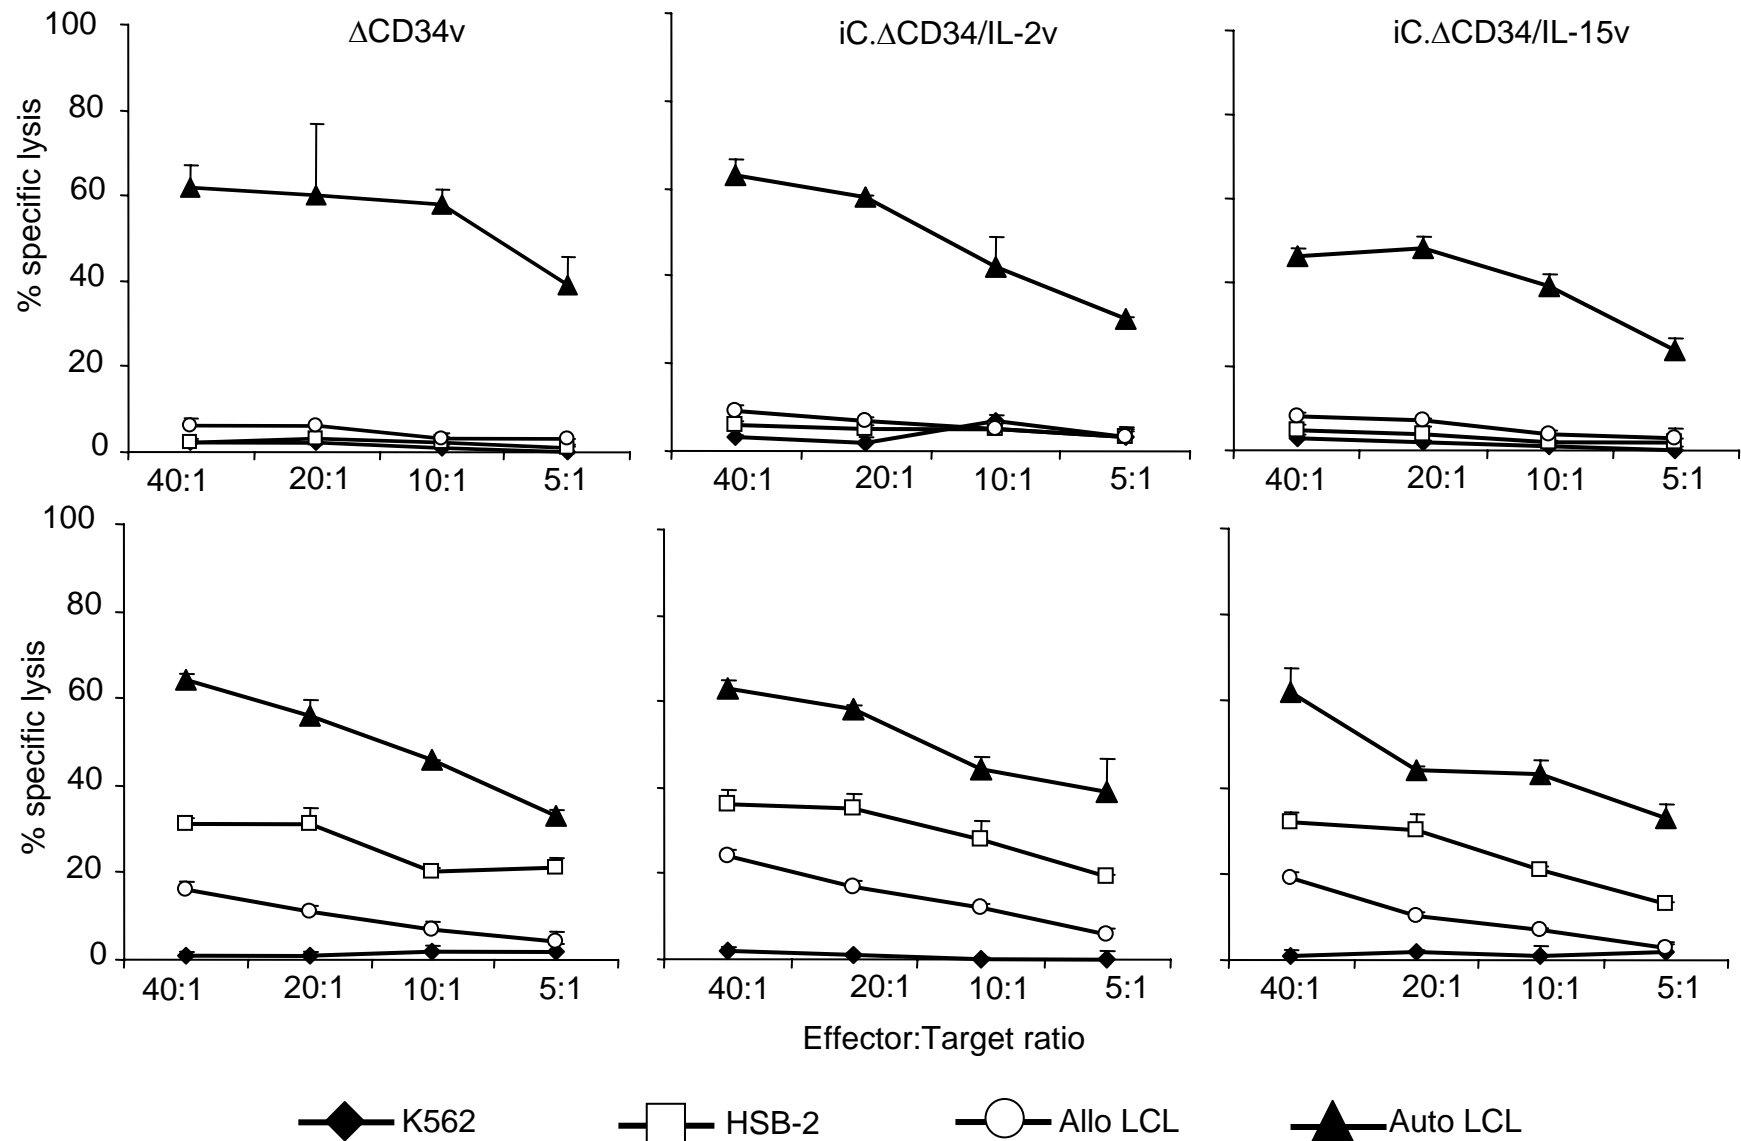

Supplement: blood_blood-2007-02-072843_4.pdf [file blood_blood-2007-02-072843_4.pdf]

Tumor free survival

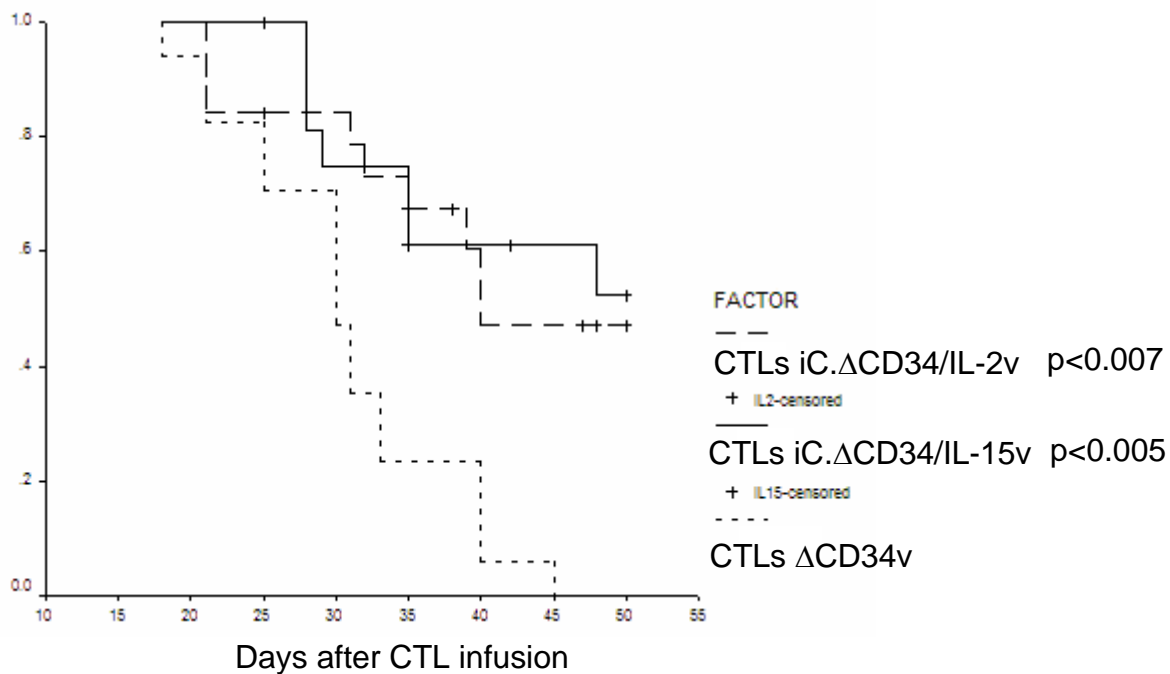

Supplement: blood_blood-2007-02-072843_5.pdf [file blood_blood-2007-02-072843_5.pdf]

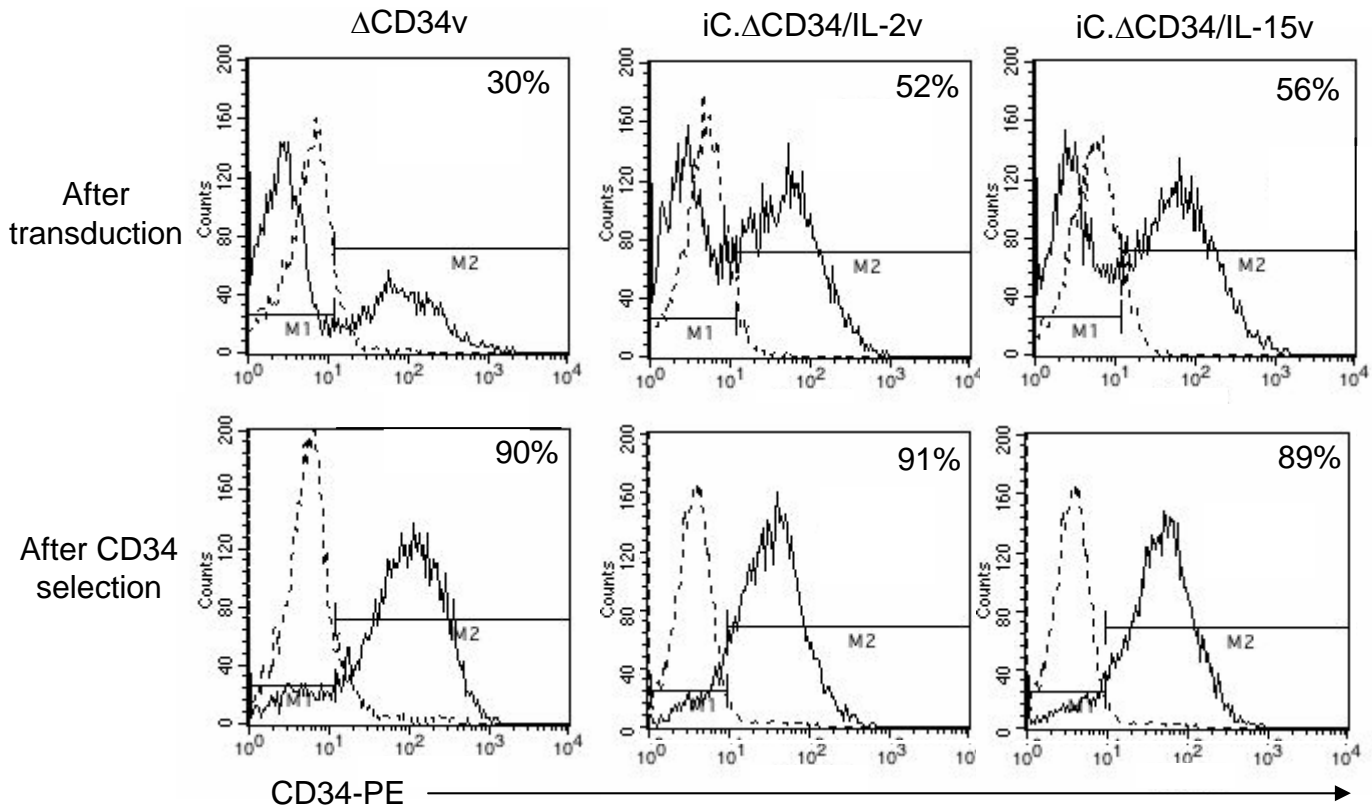

Supplement: blood_blood-2007-02-072843_6.pdf [file blood_blood-2007-02-072843_6.pdf]
